# Supplementary material for: Leaders and Laggards in Life Expectancy Among European Scholars From the Sixteenth to the Early Twentieth Century
Source: Oxford University Press journal article supplement (doi:10.1215/00703370-8938107), 2021-01-22
Supplement: stelter_esm.pdf [file stelter_esm.pdf]

## **A Online Appendix**

### **Leaders and Laggards in Life Expectancy Among European Scholars From the Sixteenth to the Early Twentieth Century**

Robert Stelter, David de la Croix and Mikko Myrskylä

## A.1 Universities and Academies of Sciences

Tab. A1: Sources for Universities and Academies of Sciences

| No.                                                    | University               | Year | QG. | Obs. | Wiki | RAG | Sources                                                                                         |
|--------------------------------------------------------|--------------------------|------|-----|------|------|-----|-------------------------------------------------------------------------------------------------|
| <b>Universities in the Holy Roman Empire 1348–1599</b> |                          |      |     |      |      |     |                                                                                                 |
| 1.                                                     | University of Prague     | 1348 | 2   | 1315 | x    | x   | Čornejová and Fechtnerová (1986); Svatoš (1995)                                                 |
| 2.                                                     | University of Vienna     | 1365 | 2   | 1508 | x    | x   | Lackner (1976)                                                                                  |
| 3.                                                     | University of Heidelberg | 1386 | 1   | 1995 |      |     | Drüll (1991; 2002; 2009; 2012)                                                                  |
| 4.                                                     | University of Cologne    | 1388 | 2   | 722  | x    | x   | Bianco (1974)                                                                                   |
| 5.                                                     | University of Erfurt     | 1389 | 3   | 309  | x    | x   |                                                                                                 |
| 6.                                                     | University of Würzburg   | 1402 | 2   | 761  |      |     | Walter (2010); Reindl (1966)                                                                    |
| 7.                                                     | Leipzig University       | 1409 | 1   | 1184 |      |     | <i>Catal. Prof. Lipsiensium</i>                                                                 |
| 8.                                                     | University of Rostock    | 1419 | 1   | 809  |      |     | <i>Catal. Prof. Rostochiensium</i>                                                              |
| 9.                                                     | University of Dole       | 1422 | 3   | 63   |      |     | Fourquet (1929)                                                                                 |
| 10.                                                    | University of Louvain    | 1425 | 2   | 680  |      |     | Brants (1906); Nève (1856); Ram (1861); Lamberts and Roegiers (1990); Tricot-Royer (1927)       |
| 11.                                                    | University of Greifswald | 1456 | 3   | 725  | x    |     |                                                                                                 |
| 12.                                                    | University of Freiburg   | 1457 | 2   | 696  | x    |     | Bauer (1957); Ruth (2001); Kurrus (1977)                                                        |
| 13.                                                    | University of Ingolstadt | 1472 | 3   | 236  |      |     |                                                                                                 |
| 14.                                                    | University of Trier      | 1473 | 4   | 69   |      |     |                                                                                                 |
| 15.                                                    | University of Tübingen   | 1477 | 1   | 993  |      |     | Conrad (1960)                                                                                   |
| 16.                                                    | University of Mainz      | 1477 | 1   | 974  |      |     | Benzing (1986)                                                                                  |
| 17.                                                    | University of Wittenberg | 1502 | 2   | 169  |      |     | Kohnle and Kusche (2016)                                                                        |
| 18.                                                    | Brand. Uni. of Frankfurt | 1506 | 3   | 135  | x    |     |                                                                                                 |
| 19.                                                    | University of Marburg    | 1527 | 1   | 1634 |      |     | <i>Marburger Prof.-katalog</i><br>Auerbach and Gundlach (1979);<br>Gundlach and Auerbach (1927) |
| 20.                                                    | University of Strasbourg | 1538 | 2   | 531  |      |     | Berger-Levrault (1890)                                                                          |
| 21.                                                    | University of Dillingen  | 1553 | 3   | 137  | x    |     |                                                                                                 |
| 22.                                                    | University of Jena       | 1558 | 2   | 625  |      |     | Günther (1858)                                                                                  |
| 23.                                                    | University of Douai      | 1559 | 3   | 63   |      |     |                                                                                                 |
| 24.                                                    | University of Eichstätt  | 1564 | 4   | 13   |      |     |                                                                                                 |
| 25.                                                    | University of Olomouc    | 1573 | 3   | 303  | x    |     |                                                                                                 |
| 26.                                                    | University of Linz       | 1574 | 4   | 14   |      |     |                                                                                                 |
| 28.                                                    | University of Helmstedt  | 1576 | 1   | 294  |      |     | <i>Prof.-katalog Helmstedt</i>                                                                  |
| 29.                                                    | University of Herborn    | 1584 | 4   | 12   |      |     |                                                                                                 |
| 30.                                                    | University of Graz       | 1585 | 2   | 531  | x    |     | Krones (1886)                                                                                   |

Column *QG.* contains the quality group of data sources: 1 (almost) complete data, 2 partially complete data, 3 non-complete data, and 4 scattered data. Column *Obs.* indicates the number of observations, and *Wiki* indicates whether at least some of the observations were found by means of Wikipedia. *RAG* refers to data from the *Repertorium Academicum Germanicum*. Appendix A.5 provides an overview of the links to online professor catalogs that were included.

\* Because of a joint source, the University of Strasbourg includes most of the observations.

| No.                                                    | University                   | Year | QG. | Obs. | Wiki | RAG | Sources                                                         |
|--------------------------------------------------------|------------------------------|------|-----|------|------|-----|-----------------------------------------------------------------|
| <b>Universities in the Holy Roman Empire 1600–1799</b> |                              |      |     |      |      |     |                                                                 |
| 32.                                                    | University of Gießen         | 1607 | 1   | 1057 |      |     | Haupt and Lehnert (1907);<br>Rehmann (1957)                     |
| 33.                                                    | University of Stadthagen     | 1610 | 1   | 2**  |      |     | Hänsel (1971)                                                   |
| 35.                                                    | University of Paderborn      | 1614 | 4   | 43   |      |     |                                                                 |
| 36.                                                    | University of Molsheim       | 1618 | 2   | 48*  |      |     | Berger-Levrault (1890)                                          |
| 37.                                                    | University of Rinteln        | 1621 | 1   | 172  |      |     | Hänsel (1971)                                                   |
| 38.                                                    | University of Salzburg       | 1622 | 4   | 24   |      |     |                                                                 |
| 39.                                                    | University of Altdorf        | 1622 | 2   | 98   | x    |     | Flessa (1969)                                                   |
| 40.                                                    | University of Osnabrück      | 1629 | 4   | 29   |      |     |                                                                 |
| 42.                                                    | University of Kassel         | 1633 | 4   | 4    |      |     |                                                                 |
| 44.                                                    | University of Bamberg        | 1647 | 1   | 426  |      |     | <i>Bamberger Professorinnen-<br/>und Professorenkatalog</i>     |
| 47.                                                    | University of Duisburg       | 1655 | 4   | 15   |      |     |                                                                 |
| 48.                                                    | University of Kiel           | 1665 | 1   | 1373 |      |     | <i>Kieler Gelehrtenverzeichnis</i><br>Volbehr and Weyl (1956)   |
| 49.                                                    | University of Innsbruck      | 1669 | 4   | 174  |      |     |                                                                 |
| 50.                                                    | University of Franche-Comté  | 1691 | 3   | 11   |      |     | Fourquet (1929)                                                 |
| 51.                                                    | University of Halle          | 1694 | 2   | 1040 |      |     | <i>Catal. Prof. Halensis</i>                                    |
| 52.                                                    | University of Breslau        | 1702 | 4   | 177  |      |     |                                                                 |
| 53.                                                    | University of Göttingen      | 1734 | 1   | 1744 |      |     | Ebel (1962)                                                     |
| 54.                                                    | Theol. fac. Fulda            | 1734 | 4   | 58   |      |     |                                                                 |
| 55.                                                    | University Erlangen-N.       | 1743 | 1   | 733  |      |     | Wedel-Schaper and Wittern (1993);<br>Ley (1999); Wachter (2009) |
| 56.                                                    | TU Braunschweig              | 1745 | 1   | 520  |      |     | Gundler (1991); Albrecht (1986)                                 |
| 57.                                                    | University of Bützow         | 1760 | 3   | 32   | x    |     |                                                                 |
| 58.                                                    | TU Freiberg                  | 1765 | 1   | 110  |      |     | Schleiff <i>et al.</i> (2015)                                   |
| 59.                                                    | TU Berlin                    | 1770 | 4   | 7    |      |     |                                                                 |
| 60.                                                    | University of Münster        | 1771 | 4   | 103  |      |     |                                                                 |
| 61.                                                    | TU Clausthal                 | 1775 | 1   | 147  | x    |     | Müller (1999); Valentiner (1925)                                |
| 62.                                                    | University of Bonn           | 1777 | 2   | 607  |      |     | Wenig (1968)                                                    |
| 63.                                                    | Karl's High School Stuttgart | 1781 | 3   | 37   | x    |     |                                                                 |
| <b>Universities in the Netherlands</b>                 |                              |      |     |      |      |     |                                                                 |
| 27.                                                    | Leiden University            | 1575 | 1   | 682  |      |     | <i>Leidse Hoogleraren vanaf 1575</i>                            |
| 31.                                                    | University of Franeker       | 1585 | 2   | 151  | x    |     | Napjus and Lindeboom (1985);<br>Feenstra <i>et al.</i> (2003)   |
| 34.                                                    | University of Groningen      | 1614 | 1   | 443  |      |     | <i>C. P. Academiae Groninganae</i>                              |
| 41.                                                    | University of Amsterdam      | 1632 | 1   | 553  |      |     | <i>Album Academicum</i>                                         |
| 43.                                                    | Utrecht University           | 1636 | 1   | 491  |      |     | <i>C. P. Academiae Rheno-Traiectinae</i>                        |
| 45.                                                    | University of Harderwijk     | 1648 | 1   | 130  | x    |     | van Epen (1904)                                                 |
| 46.                                                    | University of Nijmegen       | 1655 | 3   | 21   | x    |     |                                                                 |

Column *QG.* contains the quality group of data sources: 1 (almost) complete data, 2 partially complete data, 3 non-complete data, and 4 scattered data. Column *Obs.* indicates the number of observations, and *Wiki* indicates whether at least some of the observations were found by means of Wikipedia. *RAG* refers to data from the *Repertorium Academicum Germanicum*. Appendix A.5 provides an overview of the links to online professor catalogs that were included.

| No.                          | Academy                   | Year | QG. | Obs. | Wiki | Reg. | Sources                   |
|------------------------------|---------------------------|------|-----|------|------|------|---------------------------|
| <b>Academies of sciences</b> |                           |      |     |      |      |      |                           |
| 64.                          | Leopoldina                | 1652 | 1   | 4886 |      | x    |                           |
| 65.                          | Berlin-Brandenburg (BBAW) | 1700 | 1   | 2449 |      | x    |                           |
| 66.                          | Göttingen (AdW)           | 1751 | 1   | 1849 |      |      | Krahnke (2001)            |
| 67.                          | Erfurt                    | 1752 | 1   | 1968 |      |      | Kiefer (2004)             |
| 68.                          | München (BADW)            | 1759 | 1   | 2568 |      | x    |                           |
| 69.                          | Mannheim                  | 1763 | 3   | 47   | x    |      | Eid (1926)                |
| 70.                          | Brussels                  | 1769 | 2   | 56   |      |      | Hasquin (2009)            |
| 71.                          | Görlitz (OLGdW)           | 1779 | 1   | 1985 |      |      | Fröde (2017)              |
| 72.                          | Amsterdam (KNAW)          | 1808 | 1   | 1602 |      |      | van de Kaa and Roo (2008) |
| 73.                          | Leipzig                   | 1846 | 1   | 448  |      | x    |                           |
| 74.                          | Heidelberg                | 1909 | 1   | 310  |      | x    |                           |
| 75.                          | Mainz                     | 1949 | 1   | 175  |      | x    |                           |

Column *QG.* contains the quality group of data sources: 1 (almost) complete data, 2 partially complete data, 3 non-complete data, and 4 scattered data. Column *Obs.* indicates the number of observations, and *Wiki* indicates whether at least some of the observations were found by means of Wikipedia. *Reg.* refers to sources from official registers provided by the academy.

## A.2 Additional Material on the Data Quality

The presentation of histograms (see Fig. A1–A4) and the shares of birth and death years ending with 0 or 5 (see Fig. A5) are only two options for evaluating the quality of the data. The calculation of an adjusted Whipple-Index (Hobbs, 2004) is another option, and it also relates the birth or death years ending with 0 or 5 to the overall number of births or deaths in the period. The index takes values between 0 and 500. The index is 500 if all observations end with 0 or 5, and is 100 if the observations are uniformly distributed. Provided the index is lower than 105, heaping in the year of birth or death is considered low, and the data quality is considered high. Index values of 105–110 indicate that the data are relatively accurate, while index values of 110–125 suggest the data are fairly okay. The data quality can be considered poor at index values of 125–175, and very poor at index values exceeding 175.

Findings in Tab. A2 support the observations from Fig. 2. Already at the beginning of the seventeenth century, the quality of the birth year data is fairly okay. As soon as we only include observations with a year of birth that is not marked as “around”, “approximated” and so on in the sources of our database, the data quality of early observations improves, and is already fairly okay in the second half of the sixteenth century. The adjusted Whipple-Index values on death year heaping show that the data quality is at least fairly okay already

from the beginning of the fourteenth century in the overall sample. However, as soon as we limit the data to the observations from the baseline mortality estimation, the index does not exceed 125 fifty years later.

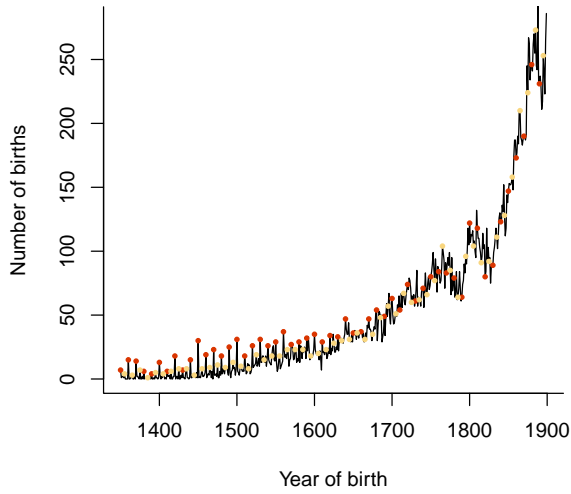

(a) All scholars with birth information

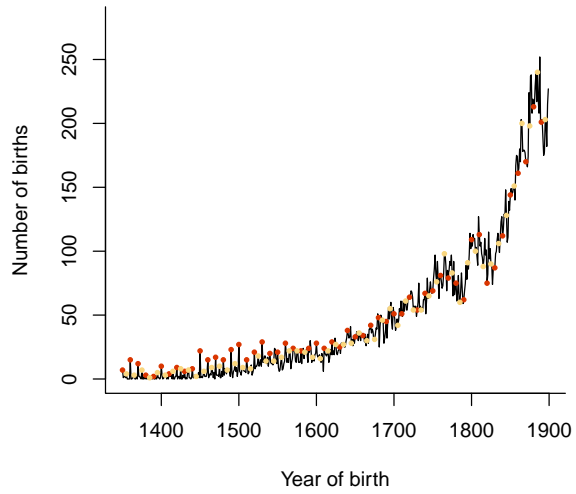

(b) Scholars in the baseline mortality estimation

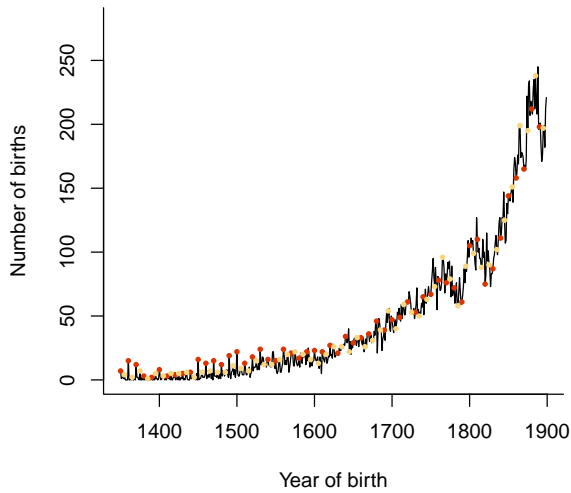

(c) Scholars from almost or partially complete data (quality group 1 or 2)

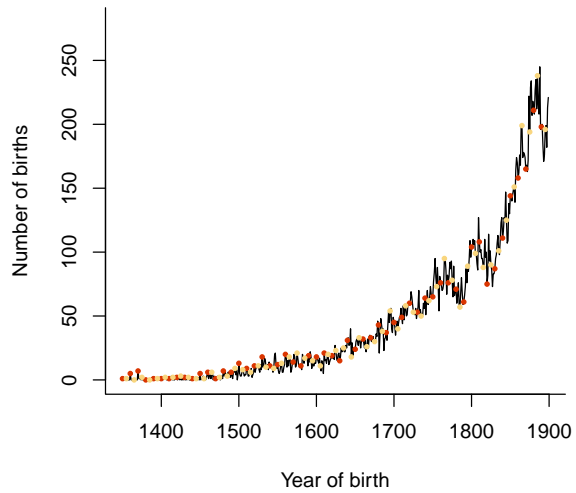

(d) Scholars from almost or partially complete data (quality group 1 or 2) with known year of birth

**Fig. A1. Number of observations by birth year**

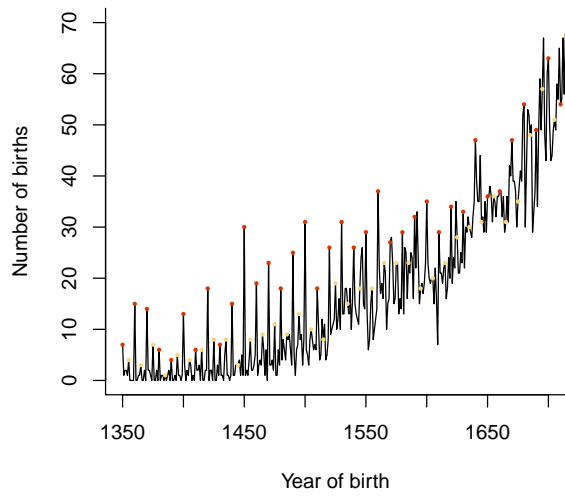

(a) All scholars with birth information

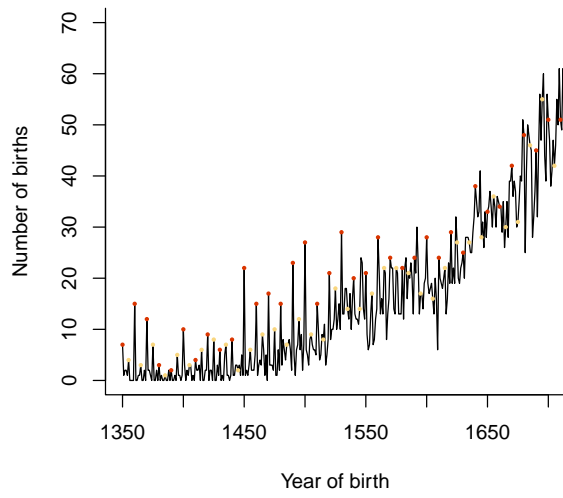

(b) Scholars in the baseline mortality estimation

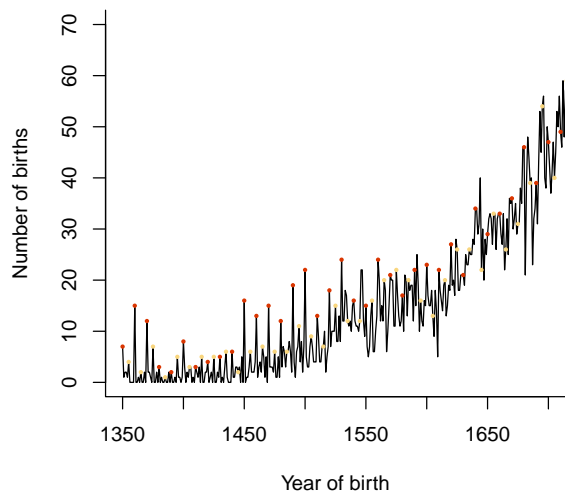

(c) Scholars from almost or partially complete data (quality group 1 or 2)

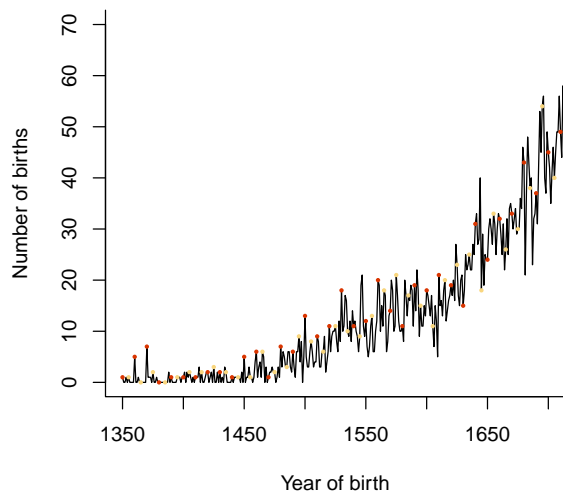

(d) Scholars from almost or partially complete data (quality group 1 or 2) with known year of birth

**Fig. A2. Number of observations by birth year until 1700**

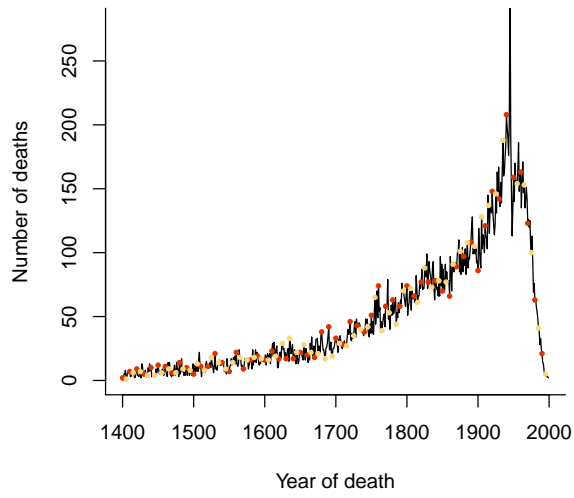

(a) All scholars with death information

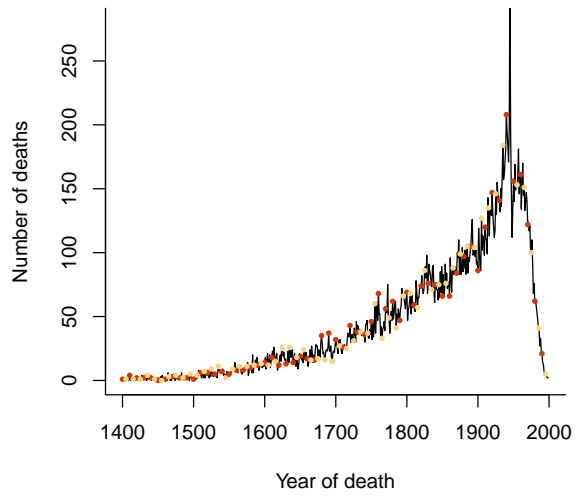

(b) Scholars in the baseline mortality estimation

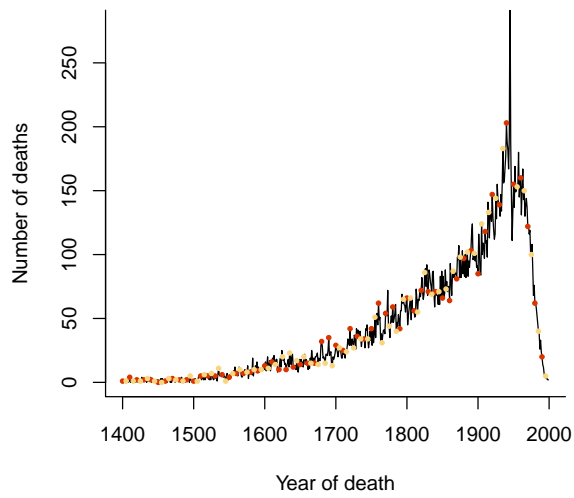

(c) Scholars from almost or partially complete data (quality group 1 or 2)

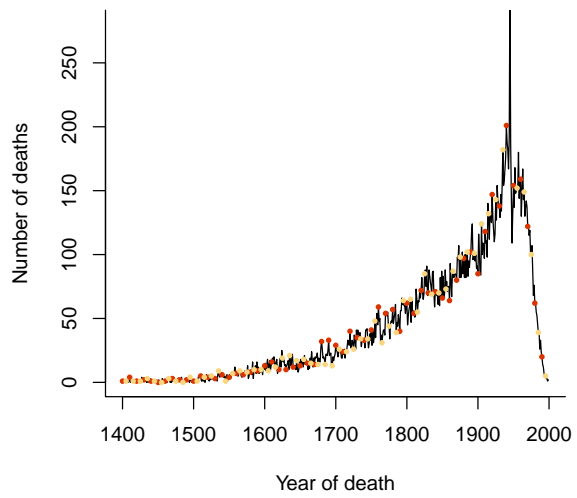

(d) Scholars from almost or partially complete data (quality group 1 or 2) with known year of death

**Fig. A3. Number of observations by death year**

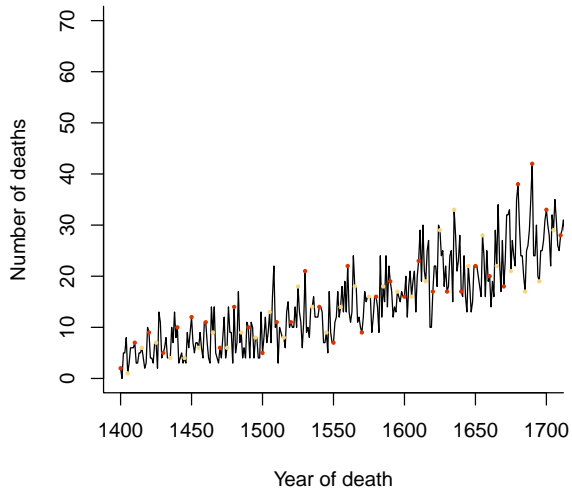

(a) All scholars with death information

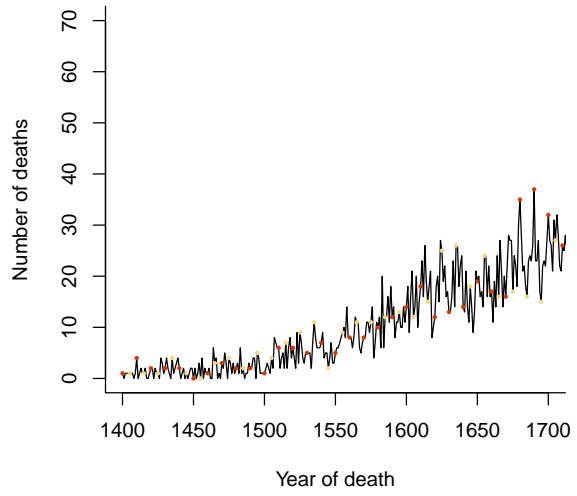

(b) Scholars in the baseline mortality estimation

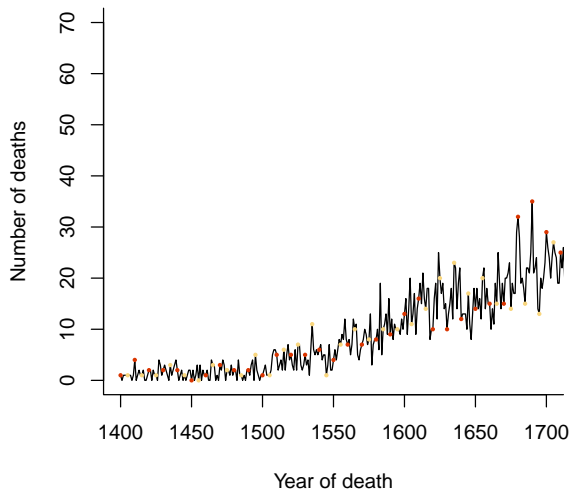

(c) Scholars from almost or partially complete data (quality group 1 or 2)

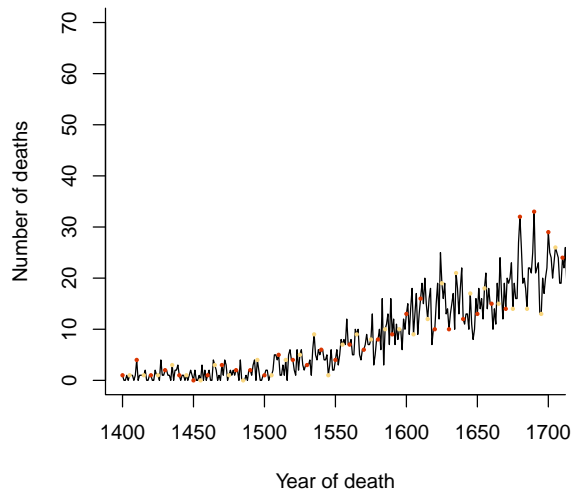

(d) Scholars from almost or partially complete data (quality group 1 or 2) with known year of death

**Fig. A4. Number of observations by death year until 1700**



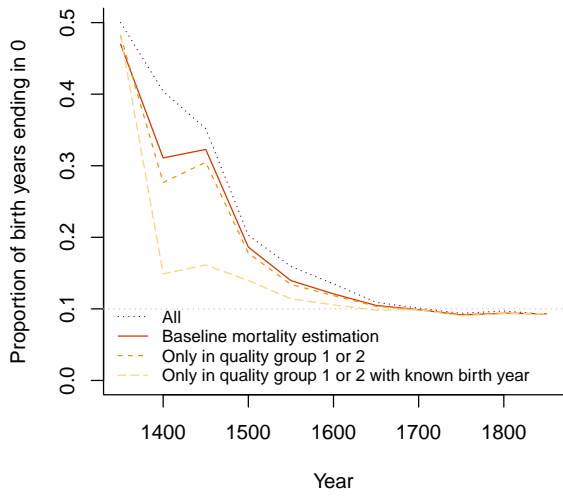

(a) Proportion of birth years ending with 0

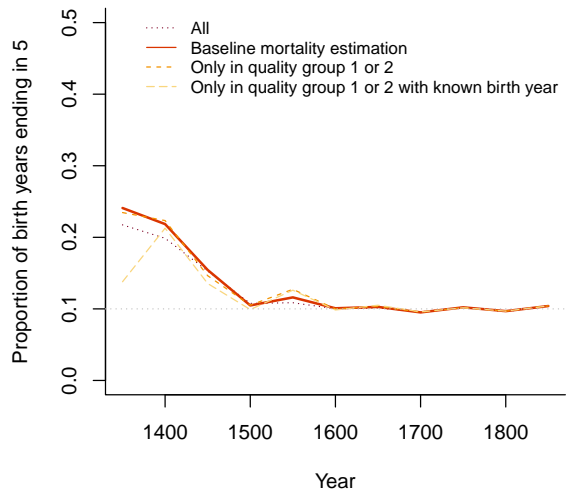

(b) Proportion of birth years ending with 5

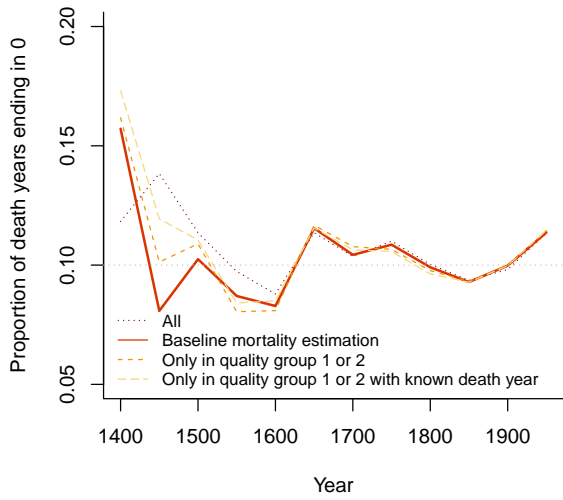

(c) Proportion of death years ending with 0

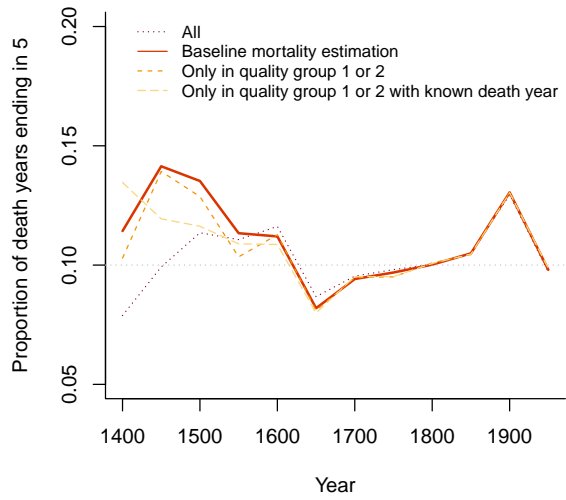

(d) Proportion of death years ending with 5

**Fig. A5. Birth and death years ending with 0 or 5 in the population of scholars**

**Tab. A2: Adjusted Whipple-Index to measure birth and death year heaping**

| Period    | Birth year heaping |        |                                          |        |                            |        | Death year heaping |        |                                          |        |                            |        |
|-----------|--------------------|--------|------------------------------------------|--------|----------------------------|--------|--------------------|--------|------------------------------------------|--------|----------------------------|--------|
|           | All                |        | With year of birth, app. & death or exit |        | With certain year of birth |        | All                |        | With year of birth, app. & death or exit |        | With certain year of birth |        |
|           | Quality groups     |        | Quality groups                           |        | Quality groups             |        | Quality groups     |        | Quality groups                           |        | Quality groups             |        |
|           | All                | 1 or 2 | All                                      | 1 or 2 | All                        | 1 or 2 | All                | 1 or 2 | All                                      | 1 or 2 | All                        | 1 or 2 |
| 1348–1397 | 324.2              | 325.8  | 313.3                                    | 314.8  | 293.1                      | 293.1  | 204.5              | 204.5  | 272.7                                    | 272.7  | 250.0                      | 250.0  |
| 1398–1447 | 312.1              | 295.5  | 280.2                                    | 266.3  | 196.4                      | 184.8  | 100.4              | 95.3   | 146.2                                    | 142.9  | 170.0                      | 166.7  |
| 1448–1497 | 256.2              | 235.0  | 244.6                                    | 234.4  | 157.0                      | 153.3  | 119.4              | 122.4  | 111.1                                    | 118.8  | 107.6                      | 119.4  |
| 1498–1547 | 159.8              | 150.7  | 152.7                                    | 146.6  | 127.0                      | 123.8  | 113.3              | 109.9  | 120.3                                    | 118.7  | 115.4                      | 115.4  |
| 1548–1597 | 135.7              | 139.3  | 133.8                                    | 137.1  | 117.8                      | 123.3  | 106.4              | 103.5  | 102.6                                    | 94.7   | 107.1                      | 99.5   |
| 1598–1647 | 119.6              | 116.1  | 116.0                                    | 113.7  | 105.8                      | 104.4  | 102.5              | 102.7  | 98.5                                     | 98.0   | 95.4                       | 97.3   |
| 1648–1697 | 107.3              | 106.6  | 106.1                                    | 106.1  | 102.3                      | 103.6  | 101.9              | 102.5  | 101.3                                    | 101.3  | 100.2                      | 100.6  |
| 1698–1747 | 99.7               | 99.9   | 98.8                                     | 99.2   | 97.8                       | 98.7   | 100.8              | 102.9  | 100.2                                    | 102.5  | 100.3                      | 102.0  |
| 1748–1797 | 100.0              | 99.5   | 99.5                                     | 99.1   | 98.3                       | 98.1   | 105.8              | 104.2  | 103.8                                    | 101.7  | 103.3                      | 101.3  |
| 1798–1847 | 97.6               | 97.6   | 96.8                                     | 97.0   | 96.3                       | 96.5   | 101.3              | 100.7  | 100.5                                    | 100.2  | 99.9                       | 99.5   |
| 1848–1897 | 101.0              | 101.1  | 100.4                                    | 100.5  | 100.2                      | 100.4  | 99.7               | 99.6   | 99.4                                     | 99.3   | 99.1                       | 99.2   |
| 1898–1947 |                    |        |                                          |        |                            |        | 114.8              | 115.0  | 116.2                                    | 116.3  | 116.0                      | 116.1  |
| 1948–1997 |                    |        |                                          |        |                            |        | 100.0              | 100.7  | 100.5                                    | 101.2  | 100.5                      | 101.2  |

A Whipple-Index smaller than 105 indicates very high data quality (dark green). The data are relatively accurate in a range of 105–110 (light green); fairly okay in a range of 110–125 (yellow), poor in a range of 125–175 (orange), and very poor if the values exceed 175 (red).

## A.3 Life Expectancy

### A.3.1 Life Expectancy and the Conditional Age

Even if we observe first appointments below age 20, a sufficiently large population at risk is required to obtain convincing estimations of life expectancy  $E_{x,t}$  conditional to the corresponding ages  $x$  at time  $t$ . Using 25-year rolling intervals, Fig. A6a illustrates the increasing first appointment age over time. The year always marks the middle of the 25-year rolling interval; e.g. 1550 covers 1538–1562. Indeed, in the early sixteenth century, more than 25% of all first appointments were made below age 25. For around 350 years thereafter, the 25%-quantile remained rather stable, at between ages 27 and 30; and then increased at the end of the period under investigation. The increasing trend in the first appointment age is more evident when we look at the median and the 75%-quantile. Between 1500 and 1900, the median age increased from 30 to 36. Compared to similar exercises in the literature – for instance, Fornasin *et al.* (2010) and Andreev *et al.* (2011) – we find that the average appointment age of scholars was rather low and stable, which allows us to end our analysis at younger ages.

As in all periods except the early twentieth century at least 25% of all first appointments occurred before age 30, we have decided to fix the initial age for life table calculations at age 30. Furthermore, adding the median, the 25%-quantile, and the 75%-quantile age at death in Fig. A6b illustrates that, on average, we are able to observe scholars for rather long age spans. The gap between the median age at death and the median age at appointment is between 24 and 35 years. In the subsample of scholars in scientific academies, the median ages at death and at first appointment are even higher, although the difference is greater for the age of appointment.

An alternative approach for determining the optimal  $x$  relates the difference between upper and lower 95% confidence intervals,  $CI_{x,t}^{\text{low}}$  and  $CI_{x,t}^{\text{high}}$ , to the corresponding life expectancy  $E_{x,t}$  and, then computes the age that minimizes this value:

$$\operatorname{argmin}_x \left\{ \frac{1}{T} \sum_t \frac{CI_{x,t}^{\text{high}} - CI_{x,t}^{\text{low}}}{E_{x,t}} \right\}, \quad (1)$$

with  $T$  as the number of 25-year rolling time intervals. The initial period of 1400 covers all cohorts born in 1388–1412, and the last period covers all cohorts born in 1875–1899. The rare and scattered observations for the period before 1388 are not included. Hence, we have chosen the age  $x$  that minimizes the relative average 95% confidence interval. Proceeding in five-year age steps, this procedure leads to age 30.

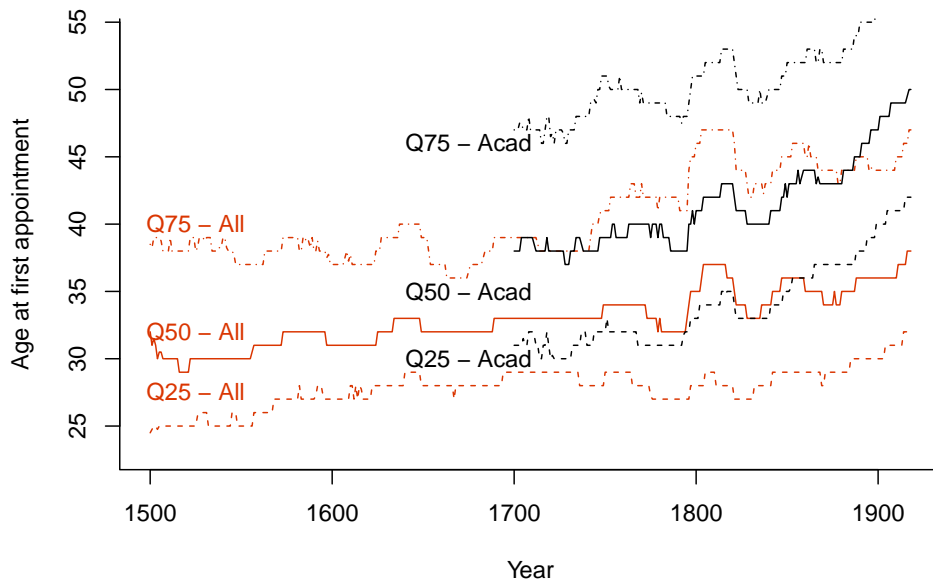

(a) Age at first appointment

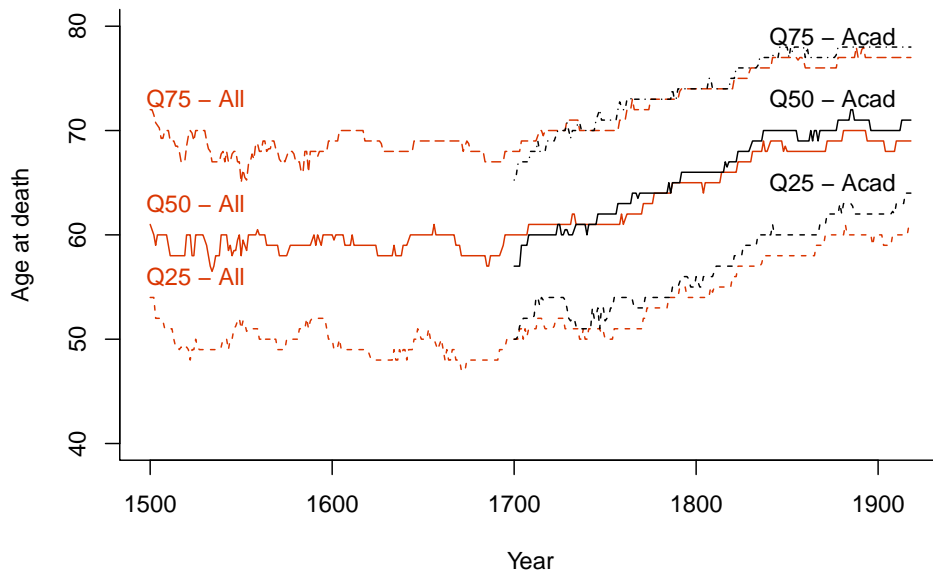

(b) Age at death

**Fig. A6.** The dynamics of age at appointment and age at death in 25-year rolling intervals

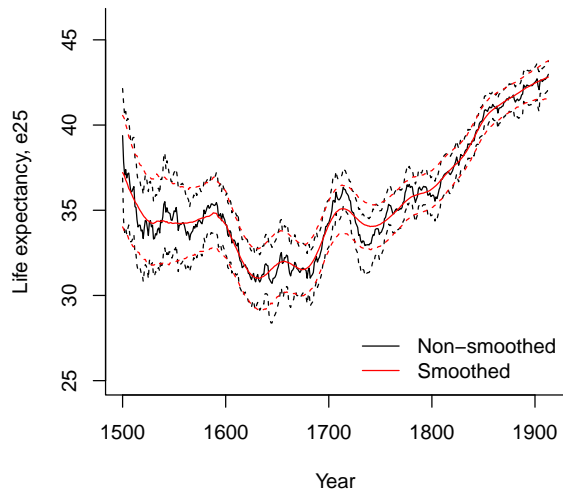

(a) Life expectancy at age 25

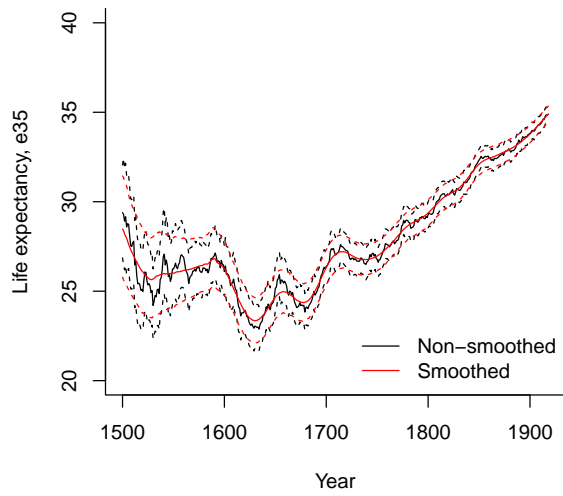

(b) Life expectancy at age 35

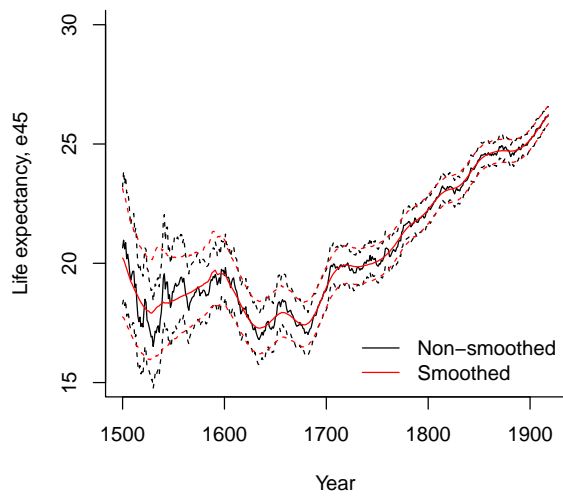

(c) Life expectancy at age 45

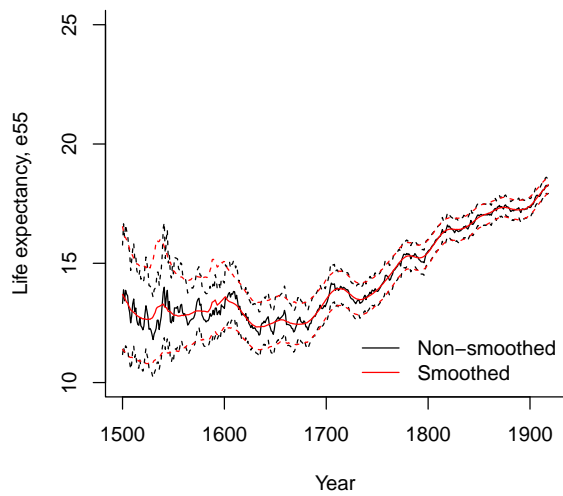

(d) Life expectancy at age 55

**Fig. A7. Dynamics of life expectancy at various ages**

Figure A7 applies 25-year rolling intervals and two-dimensional smoothed data. Dashed lines mark 95% confidence intervals.

In addition to the baseline age 30, which is presented from the period perspective in Section *Life Expectancy* and from the cohort perspective in Section *Comparison With Other Studies*, Fig. A7 illustrates the mortality dynamics for life expectancy conditional to ages 25, 35, 45, and 55.

### A.3.2 Additional Figures on the Robustness of Life Expectancy Dynamics

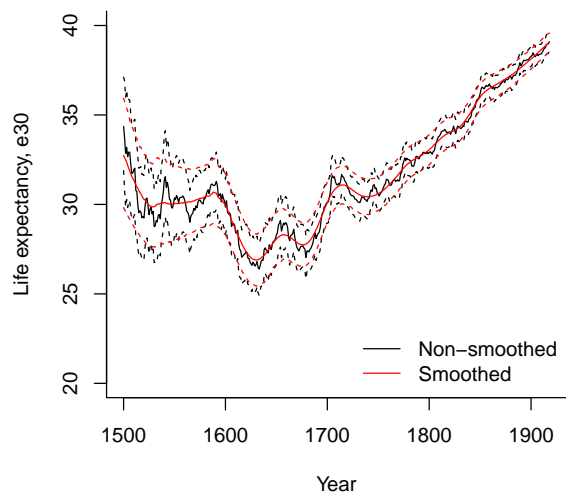

(a) Baseline estimation

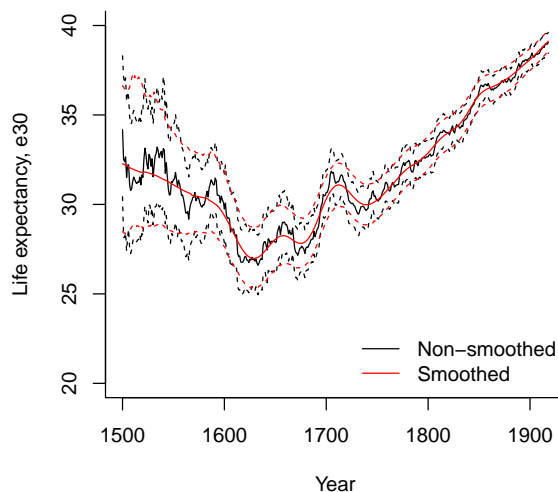

(b) Estimation including only observations with known birth year

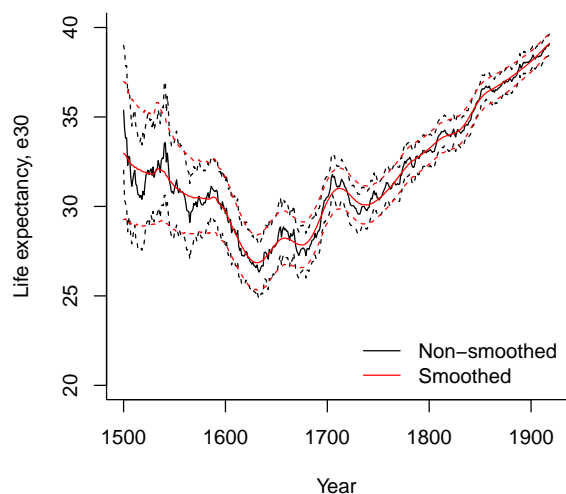

(c) Estimation including only observations from almost or partially complete data (quality group 1 or most or partially complete data (quality group 1 or 2)

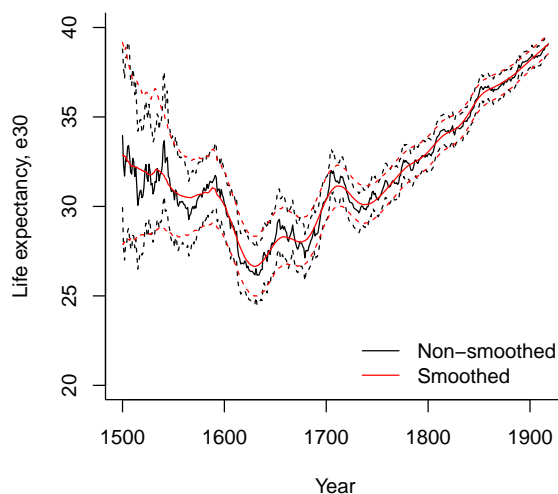

(d) Estimation including only observations from almost or partially complete data (quality group 1 or most or partially complete data (quality group 1 or 2) with known birth year

**Fig. A8. Dynamics of life expectancy according to the data quality**

Figure A8 applies 25-year rolling intervals and two-dimensional smoothed data. Dashed lines mark 95% confidence intervals.

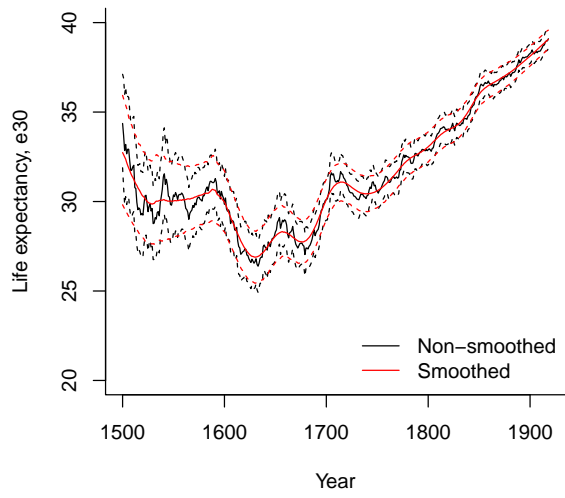

(a) Baseline estimation

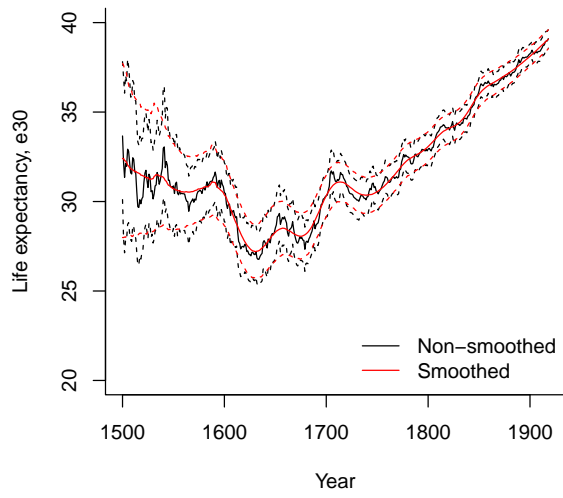

(b) Estimation without birth years ending in zero

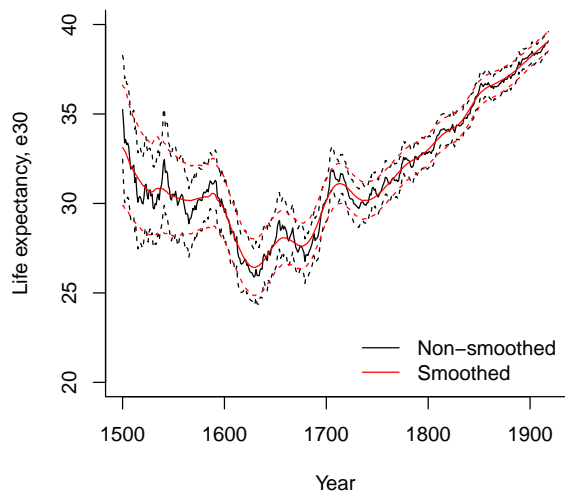

(c) Estimation without birth years ending in five

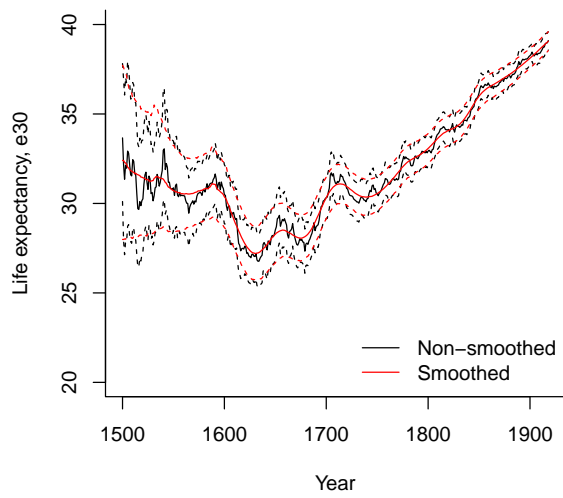

(d) Estimation without birth years ending in zero and five

**Fig. A9. Dynamics of life expectancy excluding potential birth year heaping**

Figure A9 applies 25-year rolling intervals and two-dimensional smoothed data. Dashed lines mark 95% confidence intervals.

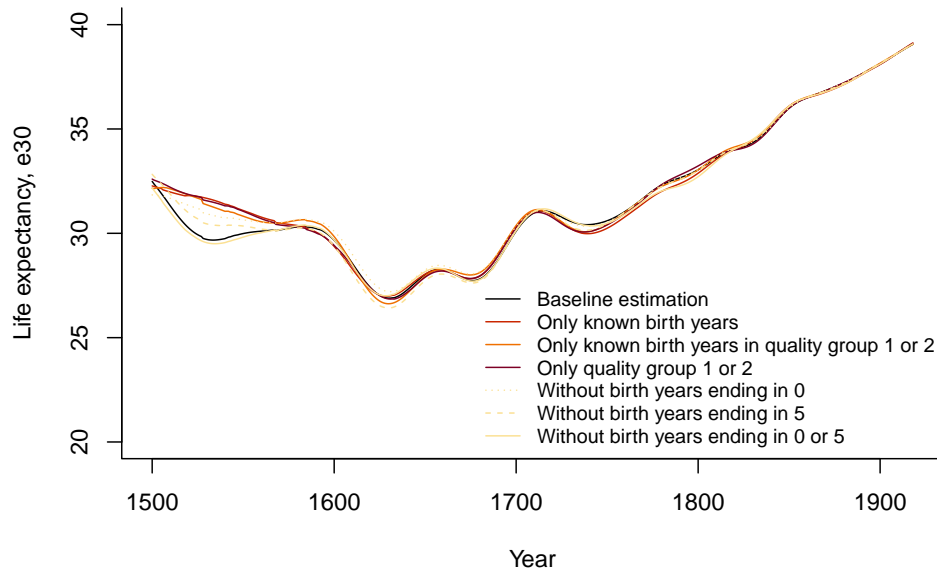

(a) Smoothed life expectancy

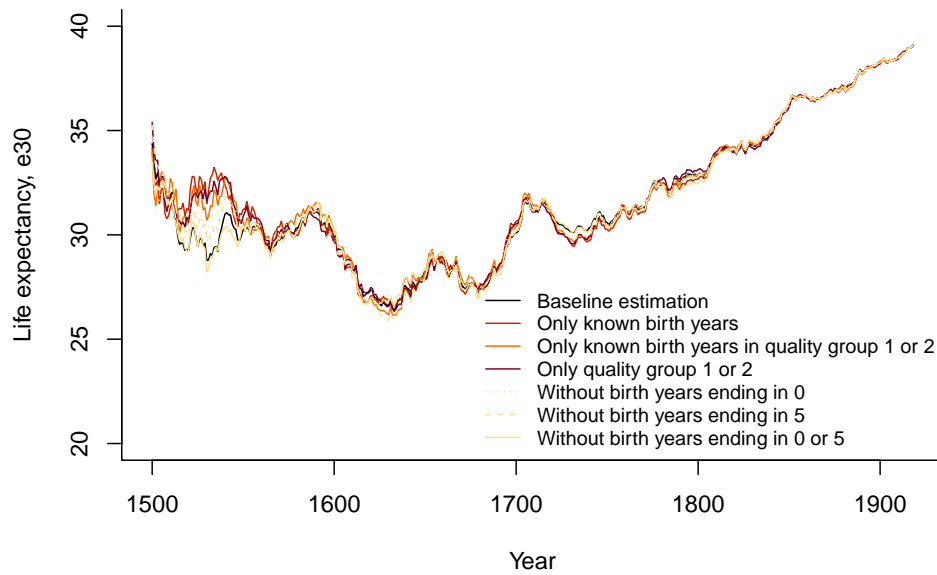

(b) Non-smoothed life expectancy

**Fig. A10. Summary of life expectancy at age 30 according to data quality**

Figure A10 applies 25-year rolling intervals and two-dimensional smoothed data.



### A.3.3 Additional Figures on Medicine, Academies, and Life Expectancy

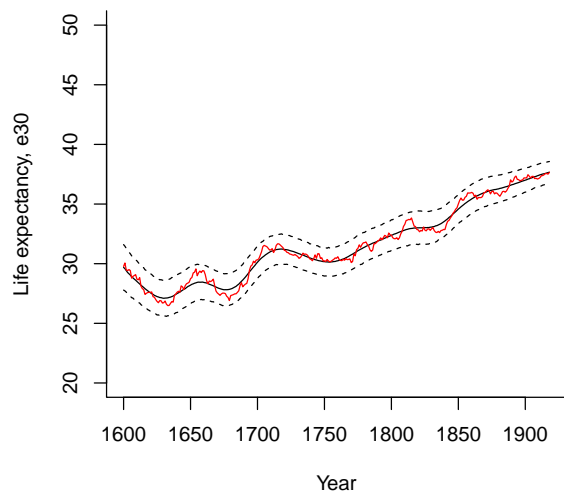

(a) Nonmedicine and university

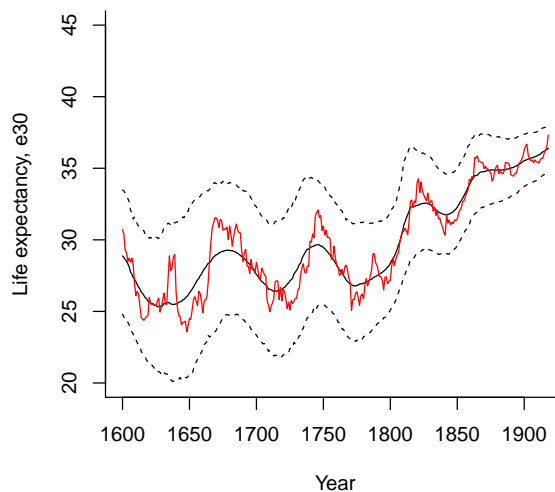

(b) Medicine and university

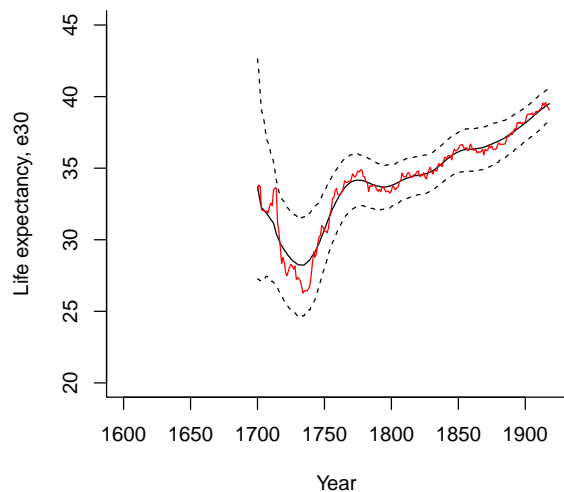

(c) Nonmedicine and academy

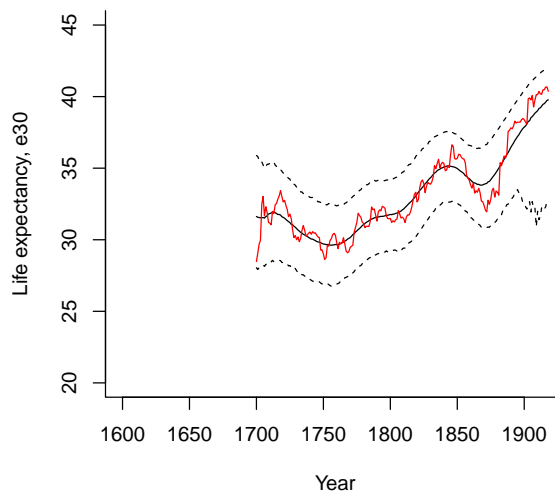

(d) Medicine and academy

**Fig. A11. Dynamics of life expectancy according to social status and field of science**

Figure A11 applies 25-year rolling intervals and two-dimensional smoothed data. Dashed lines mark 95% confidence intervals.

## A.4 A Brief History of Universities

The characteristics of our institutions and their members evolved over time. At the very beginning of our study period, in the late medieval age, the structure of universities differed considerably from that of modern institutions, which had consequences for the income and social status of scholars. The characteristics of scholars evolved accordingly.

A typical full university had a lower faculty of Arts and three higher faculties: Medicine, Theology, and Law. Scholars in the higher faculties also had higher incomes. While universities were rather independent at that time, it was common for teachers at the theological faculty to belong to a religious order. Academic titles mainly signaled that a person was a master in his field, and was linked to prestige and high social status. However, the incomes of scholars were generally rather low (Verger, 2003).

Until the end of the eighteenth century, a variety of positions, such as ordinary and extraordinary professors, doctors, and lectors, existed. These positions came with different obligations and responsibilities, and with different privileges and salaries. While all scholars enjoyed a variety of privileges – such as a special jurisdiction, tax and dress privileges, or the right to carry weapons – they lost much of their medieval freedom. Salaries remained generally low, and were often not paid regularly. Thus, it was quite common for scholars from higher faculties to work in the profession they taught. Scholars from lower faculties often held positions at schools. Incomes and privileges varied across universities. Moreover, a doctoral degree was not always required for academic positions, and the obligation to publish varied considerably. Appointments driven by kinship were rather common at universities like Gießen or Tübingen (Vandermeersch, 2003).

With the crisis of universities in the second half of the eighteenth century – the population of students declined drastically – and the emergence of the German university model, institutions changed rapidly. In the first half of the nineteenth century, payments in kind ended, salaries increased and were paid regularly. Thus, working at a university became a full-time job. The introduction of scientific standards in the process of appointments gradually reduced the role of kinship. However, kinship was still important at several universities, such as the University of Kiel. Thus, it was a period of social change toward the emergence of an academic elite. Scholars were envisioning themselves as scientists. Privileges and the role of professor dynasties declined, while the social status of tenured professors increased (Klinge, 2004; McClelland, 1988).

## A.5 Online Professor Catalogs

**Tab. A3: Overview of the professor catalogs available online and used**

| University              | Catalogue                                   | Link                                                                                                                                                |
|-------------------------|---------------------------------------------|-----------------------------------------------------------------------------------------------------------------------------------------------------|
| University of Rostock   | Catalogus Professorum Rostochiensium        | <a href="http://cpr.uni-rostock.de/">http://cpr.uni-rostock.de/</a>                                                                                 |
| Leipzig University      | Catalogus Professorum Lipsiensium           | <a href="https://research.uni-leipzig.de/catalogus-professorum-lipsiensium/">https://research.uni-leipzig.de/catalogus-professorum-lipsiensium/</a> |
| University of Marburg   | Marburger Professorenkatalog                | <a href="https://www.uni-marburg.de/uniarchiv/pkat">https://www.uni-marburg.de/uniarchiv/pkat</a>                                                   |
| University of Helmstedt | Professorenkatalog Helmstedt                | <a href="http://uni-helmstedt.hab.de/">http://uni-helmstedt.hab.de/</a>                                                                             |
| University of Kiel      | Kieler Professorenkatalog                   | <a href="https://cau.gelehrtenverzeichnis.de/">https://cau.gelehrtenverzeichnis.de/</a>                                                             |
| Leiden University       | Leidse Hoogleraren anaf 1575                | <a href="https://hoogleraren.leidenuniv.nl/">https://hoogleraren.leidenuniv.nl/</a>                                                                 |
| University of Groningen | Catalogus Prof. Academiae Groninganae       | <a href="https://hoogleraren.ub.rug.nl/">https://hoogleraren.ub.rug.nl/</a>                                                                         |
| University of Amsterdam | Album Academicum                            | <a href="http://www.albumacademicum.uva.nl/">http://www.albumacademicum.uva.nl/</a>                                                                 |
| Utrecht University      | Catalogus Prof. Academiae Rheno-Traiectinae | <a href="https://profs.library.uu.nl/">https://profs.library.uu.nl/</a>                                                                             |
| University of Mainz     | Gutenberg Biographics                       | <a href="http://gutenberg-biographics.ub.uni-mainz.de/home.html/">http://gutenberg-biographics.ub.uni-mainz.de/home.html/</a>                       |
| University of Halle     | Catalogus Professorum Halensis              | <a href="https://www.catalogus-professorum-halensis.de/">https://www.catalogus-professorum-halensis.de/</a>                                         |

## References in online appendices

- ALBRECHT, H. (1986). *Catalogus professorum der Technischen Universität Carolo-Wilhelmina zu Braunschweig: Teil 1. Lehrkräfte am Collegium Carolinum 1745-1877*. Braunschweig: Universitätsbibliothek.
- ANDREEV, E. M., JDANOV, D., SHKOLNIKOV, V. M. and LEON, D. A. (2011). Long-term trends in the longevity of scientific elites: Evidence from the British and the Russian academies of science. *Population Studies*, **65** (3), 319–334.
- ARCHIV DER UNIVERSITÄT HALLE-WITTENBERG (2019). Catalogus Professorum Halensis, <https://www.catalogus-professorum-halensis.de/>.
- ARCHIV LEOPOLDINA (2019). Mitglieder seit 1652, <https://www.leopoldina.org/mitglieder/mitglieder-seit-1652//>.
- AUERBACH, I. and GUNDLACH, F. (1979). *Catalogus professorum academiae Marburgensis: Die akademischen Lehrer der Philipps-Universität Marburg*. Marburg: Elwert.
- BAUER, J. J. (1957). *Zur Frühgeschichte der Theologischen Fakultät der Universität Freiburg i. Br.(1460-1620): Universität Freiburg im Breisgau 1457-1957. Gabe d. Theologischen Fakultät*. Freiburg: Albert.
- BAYERISCHE AKADEMIE DER WISSENSCHAFTEN (2019). Verstorbene Mitglieder, <https://badw.de/gelehrtengemeinschaft/verstorbene.html>.
- BENZING, J. (1986). *Verzeichnis der Professoren der alten Univerität Mainz*. Mainz: Universitätsbibliothek Johannes Gutenberg-Unviersität.
- BERGER-LEVRAULT, O. (1890). *Catalogus professorum Academiarum et Universitatum alsaticarum XVI-XVIII seculi, editore Oscar Berger-Levrault*. Nancy Impr. de Berger-Levrault.
- BERLIN-BRANDENBURGISCHE AKADEMIE DER WISSENSCHAFTEN (2010). Historische Akademiemitglieder, <http://www.bbaw.de/die-akademie/akademiegeschichte/mitglieder-historisch>.
- BIANCO, F. J. v. (1974). *Die alte Unvirsität Köln und die späteren Gelehrten-Schulen dieser Stadt: nach archivarischen und anderen zuverlässigen Quellen*, vol. 1. Aalen: Scientia-Verl.
- BRANTS, V. (1906). *La faculté de droit de l'Université de Louvain à travers cinq siècles <1426-1906>*. Louvain: Ch. Peeters.

- CONRAD, E. (1960). *Die Lehrstühle der Universität Tübingen und ihre Inhaber (1477-1927)*. Tübingen.
- ČORNEJOVÁ, I. and FECHTNEROVÁ, A. (1986). *Životopisný slovník Pražské Univerzity: Filozofická a Teologická Fakulta 1654 - 1773*. Praha: Univ. Karlova, 1st edn.
- DORSMAN, L. (2011). *Catalogus Professorum Academiae Rheno-Traiectinae*, <http://profs.library.uu.nl/index.php/info/project>.
- DRÜLL, D. (2009). *Heidelberger Gelehrtenlexikon 1933–1986*. Berlin, Heidelberg: Springer.
- DRÜLL, D. (2012). *Heidelberger Gelehrtenlexikon 1803–1932*. Berlin, Heidelberg: Springer.
- DRÜLL-ZIMMERMANN, D. (1991). *Heidelberger Gelehrtenlexikon 1652–1802*. Berlin, Heidelberg: Springer.
- DRÜLL-ZIMMERMANN, D. (2002). *Heidelberger Gelehrtenlexikon 1386–1651*. Berlin, Heidelberg: Springer.
- EBEL, W. (ed.) (1962). *Catalogus professorum Göttingensium: 1734–1962*. Göttingen and Göttingen: Vandenhoeck & Ruprecht and Niedersächsische Staats- und Universitätsbibliothek.
- EID, L. (1926). *Die gelehrten Gesellschaften der Pfalz*. Speyer, Lehrerbildgsanst.: [Selbstverl.].
- FEENSTRA, R., AHSMANN, M. and VEEN, T. (2003). *Bibliografie van hoogleraren in de rechten aan de Franeker Universiteit tot 1811*. Amsterdam: Koninklijke Nederlandse Akademie van Wetenschappen.
- FLESSA, D. (1969). *Die Professoren der Medizin zu Altdorf von 1580 - 1809*. Universität Erlangen-Nürnberg.
- FORNASIN, A., BRESCHI, M. and MANFREDINI, M. (2010). Mortality patterns of cardinals (sixteenth–twentieth centuries). *Population*, **65** (4), 631–652.
- FOURQUET, É. (1929). *Les hommes célèbres et les personnalités marquantes de Franche-Comté: du IVe siècle à nos jours*. Besançon: Séquania.
- FRÖDE, T. (2017). *Biographisches Lexikon der Mitglieder der Oberlausitzischen Gesellschaft der Wissenschaften: 1779-1945*. Görlitz: Oberlausitzische Gesellschaft der Wissenschaften e. V.

- GLEIXNER, U. (2018). Professorenkatalog, <http://uni-helmstedt.hab.de/index.php>.
- GRONINGEN, R. (2014). *Catalogus Professorum Academiae Groninganae*, <https://hoogleraren.ub.rug.nl/>.
- GUNDLACH, F. and AUERBACH, I. (1927). *Catalogus professorum academiae Marburgensis; die akademischen Lehrer der Philipps-Universität in Marburg*. Marburg: N. G. Elwert'sche Verlagsbuchhandlung G. Braun.
- GUNDLER, B. (1991). *Catalogus Professorum der Technischen Universität Carolo-Wilhelmina zu Braunschweig. Teil 2: Lehrkräfte 1877-1945*. Braunschweig: Braunschweiger Hochschulbund.
- GÜNTHER, J. (1858). *Lebensskizzen der Professoren der Universität Jena seit 1558 bis 1858: Eine Festgabe zur 300-jährigen Säkularfeier der Universität am 15., 16., und 17. August 1858*. Jena: Mauke.
- HÄNSEL, W. (1971). *Catalogus Professorum Rinteliensium – Die Professoren Universität Rinteln and akademischen Gymnasiums zu Stadshagen 1610–1810*. Rinteln: Verlag C. Bösendahl.
- HASQUIN, H. (2009). *L'Académie impériale et royale de Bruxelles. Ses académiciens et leurs réseaux intellectuels au XVIIIe siècle*. Bruxelles: Académie Royale de Belgique.
- HAUPT, H. and LEHNERT, G. (1907). *Chronik der Universität Gießen von 1607–1907*. Gießen: Universitätsbibliothek.
- HEIDELBERGER AKADEMIE DER WISSENSCHAFTEN (2019). Die Mitglieder der HAdW seit ihrer Gründung 1909, <https://www.haw.uni-heidelberg.de/akademie/mitglieder1909.de.html>.
- HOBBS, F. (2004). Age and sex composition. In H. S. Shryock, J. S. Siegel and E. A. Larmon (eds.), *The methods and materials of demography*, 2nd edn., US Bureau of the Census, pp. 125–174.
- KIEFER, J. (2004). *Bio-bibliographisches Handbuch der Akademie Gemeinnütziger Wissenschaften zu Erfurt: 1754–2004*. Erfurt: Akad. Gemeinnütziger Wiss. zu Erfurt.
- KLINGE, M. (2004). Teachers. In W. Rüegg (ed.), *A History of the University in Europe, Universities in the Nineteenth and Early Twentieth Centuries 1800–1945*, vol. III, 5, Cambridge University Press, pp. 123–162.

- KOHNLE, A. and KUSCHE, B. (2016). *Professorenbuch der theologischen Fakultät der Universität Wittenberg: 1502 bis 1815/17*. Leipzig: Evangelische Verlagsanstalt.
- KRAHNKE, H. (2001). *Die Mitglieder der Akademie der Wissenschaften zu Göttingen 1751-2001*. Göttingen: Vandenhoeck & Ruprecht.
- KRONES, F. X. (1886). *Geschichte der Karl Franzens-Universität in Graz*. Geschichte der Karl-Franzens-Universität in Graz: Festgabe zur Feier ihres dreihundertjährigen Bestandes, Graz: Verlag der Karl Franzens-Universität.
- KRÜGER, K. (2019). Catalogus Professorum Rostochiensium, <http://cpr.uni-rostock.de/>.
- KURRUS, T. (1977). *Die Jesuiten an der Universität Freiburg im Br. 1620 – 1773, Beiträge zur Freiburger Wirtschafts und Universitätsgeschichte, Issue 37*, vol. 2. Freiburg im Br.: Eberhard Albert.
- LACKNER, F. (1976). *Die Jesuitenprofessoren an der philosophischen Fakultät der Wiener Universität (1712-1773)*, vol. 1 & 2. Wien: VWGÖ, Verb. d. Wissenschaftl. Gesellschaften Österreichs.
- LAMBERTS, E. and ROEGIERS, J. (1990). *Leuven University, 1425 – 1985*. Leuven: Leuven University Press.
- LEY, A. (1999). *Die Professoren und Dozenten der Friedrich Alexander Universität 1743-1960: Teil 2: Medizinische Fakultät, Erlanger Forschungen Sonderreihe*, vol. 9. Erlangen: Univ.-Bibliothek.
- MCCLELLAND, C. E. (1988). Die deutschen Hochschullehrer als Elite 1815–1850. In K. Schwabe (ed.), *Deutsche Hochschullehrer als Elite 1815–1945*, Harald Boldt Verlag, pp. 27–54.
- MÜLLER, G. (1999). *Technische Universität Clausthal: Der Lehrkörper 1775 - 1999*. Hannover: Schlütersche GmbH & Co.KG.
- NAPJUS, J. W. and LINDEBOOM, G. A. (1985). *De hoogleraren in de geneeskunde aan de Hogeschool en het Athenaeum te Franeker, Nieuwe Nederlandse bijdragen tot de geschiedenis der geneeskunde en der natuurwetenschappen*, vol. 15. Amsterdam: Rodopi.
- NÈVE, F. (1856). *Mémoire historique et littéraire sur le Collège des trois-langues à l'Université de Louvain*, vol. 28. Hayez.

- RAM, P. F. X. D. (1861). *Les quatorze livres sur l'histoire de la ville de Louvain du docteur et professeur en théologie Jean Molanus: Historiae lovaniensium*. Collection de chroniques belges inédites, Bruxelles: Hayez.
- REHMANN, W. (1957). *Chronik der Ludwigs-Universität Gießen 1907-1945 und der Justus Liebig-Hochschule Gießen 1946-1957*. Gießen: Universitätsbibliothek.
- REINDL, M. (1966). *Lehre und Forschung in Mathematik und Naturwissenschaften, insbesondere Astronomie: an der Universität Würzburg von der Gründung bis zum Beginn des 20. Jahrhunderts*. Degener und Company.
- RUTH, H. (2001). Das Personen- und Ämtergefüge der Universität Freiburg (1520-1620). *Bd. I: Darstellung, Diss.*
- SÄCHSISCHE AKADEMIE DER WISSENSCHAFTEN ZU LEIPZIG (2019). Mitglieder, <https://www.saw-leipzig.de/de/mitglieder>.
- SCHLEIFF, H., VOLKMER, R. and KADEN, H. E. (2015). *Catalogus Professorum Fribergensis: Professoren und Lehrer der TU Bergakademie Freiberg 1765 bis 2015*. Freiberg: Verlag TU Bergakademie.
- SVATOŠ, M. (1995). *Dějiny Univerzity Karlovy I., 1347/48 – 1622, Dějiny Univerzity Karlovy 1348 - 1990*, vol. 1. Praha: Univ. Karlova.
- TRICOT-ROYER, J. J. (1927). *Coup d'oeil sur l'ancienne faculté de médecine de Louvain*. F. Ceuterick.
- UNIVERSITAIRE BIBLIOTHEKEN LEIDEN (2019). Leidse hoogleraren vanaf 1575, <https://hoogleraren.leidenuniv.nl/>.
- UNIVERSITÄTSARCHIV BAMBERG (2019). Bamberger Professorinnen- und Professorenkatalog, mimeo.
- UNIVERSITÄTSARCHIV MARBURG (2019). Marburger Professorenkatalog, <https://www.uni-marburg.de/uniarchiv/pkat/>.
- UNIVERSITY OF AMSTERDAM (2007). Album Academicum, <http://www.albumacademicum.uva.nl/>.
- VALENTINER, S. (1925). *Die Preußische Bergakademie zu Clausthal 1775/1925: Festschrift zur 150-Jahrfeier*. Leipzig: Breitkopf & Härtel.



- VAN DE KAA, D. J. and ROO, Y. D. (2008). *De Leden Van De Koninklijke Nederlandse Akademie Van Wetenschappen: Een Demografisch Perspectief: 1808 tot 2008*. Amsterdam: KNAW Press.
- VAN EPEN, D. G. (1904). *Album studiosorum Academiae gelro-zutphanicae MDCXLVIII-MDCCCXVIII*. Hagae Comitum: apud Jacobum Hoekstra.
- VANDERMEERSCH, P. A. (2003). Teachers. In H. De Ridder-Symoens (ed.), *A History of the University in Europe, Universities in Early Modern Europe 1500–1800*, vol. II, 5, Cambridge University Press, pp. 210–255.
- VERGER, J. (2003). Teachers. In H. De Ridder-Symoens (ed.), *A History of the University in Europe, Universities in the Middle Ages*, vol. I, 5, Cambridge University Press, pp. 144–168.
- VOLBEHR, F. and WEYL, R. (1956). *Professoren und Dozenten der Christian-Albrechts-Universität zu Kiel: 1665 - 1954*. Kiel: Hirt.
- VON HEHL, U. and RIECHERT, T. (2017). Catalogus Professorum Lipsiensium, <https://research.uni-leipzig.de/catalogus-professorum-lipsiensium/>.
- WACHTER, C. (2009). *Philosophische Fakultät, Naturwissenschaftliche Fakultät, Erlanger Forschungen Sonderreihe*, vol. 13. Erlangen: Univ.-Bibliothek.
- WALTER, L. K. (2010). *Dozenten und Graduierte der Theologischen Fakultät Würzburg 1402 bis 2002*. Würzburg: Schönigh.
- WEDEL-SCHAPER, E. and WITTERN, R. (1993). *Die Professoren und Dozenten der Friedrich-Alexander-Universität Erlangen-Nürnberg 1743-1860: Teil 1: Theologische Fakultät, Juristische Fakultät*. Erlangen: Univ.-Bibliothek.
- WENIG, O. (1968). *Verzeichnis der Professoren und Dozenten der Rheinischen Friedrich-Wilhelms-Universität zu Bonn 1818-1968*. Bouvier.
